# Supplementary material for: In vitro encapsulation and expansion of T and CAR-T cells using 3D synthetic thermo-responsive matrices
Source: Royal Society of Chemistry journal article supplement (doi:10.1039/d4ra01968g), 2024-01-01
Supplement: d4ra01968g1.pdf [file d4ra01968g1.pdf]

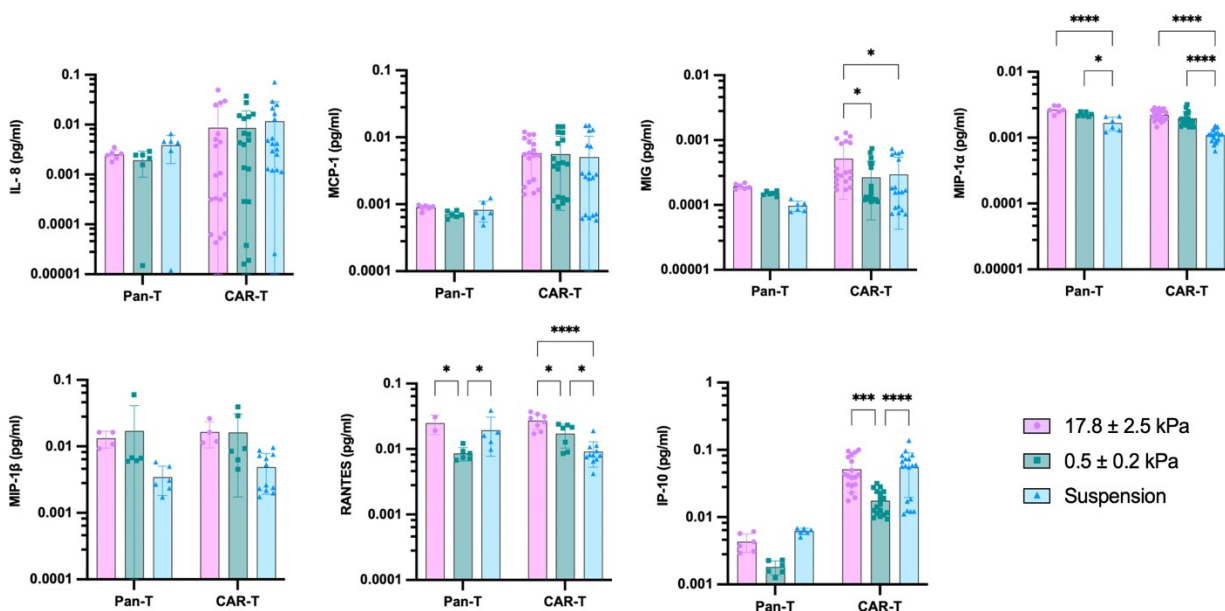

**Supplementary Figure 1:** IL-8 cytokine and chemokine secretion results of Pan-T and CAR-T cells after 5 days of culture.

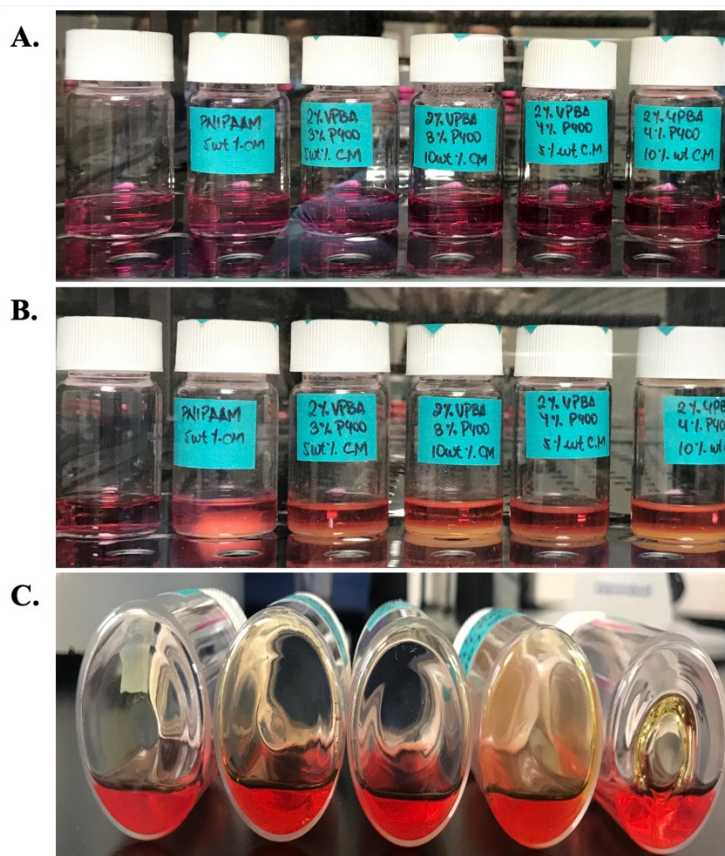

**Supplementary Figure 2:** Sol-Gel evaluation of terpolymer at 5 and 10 wt.% in SKOV-3 cell medium using pNiPAAm as control. Pictures show that the pH indicator (phenol red) present in

the cell media did not change in the presence of terpolymer, demonstrating that the pH of cell culture media was not affected by the terpolymers. Here are depicted the samples in a liquid phase before incubation (A), the gel phase formed after 2 hours of incubation (B) at 37°C, and the transparent gel phase achieved (C).

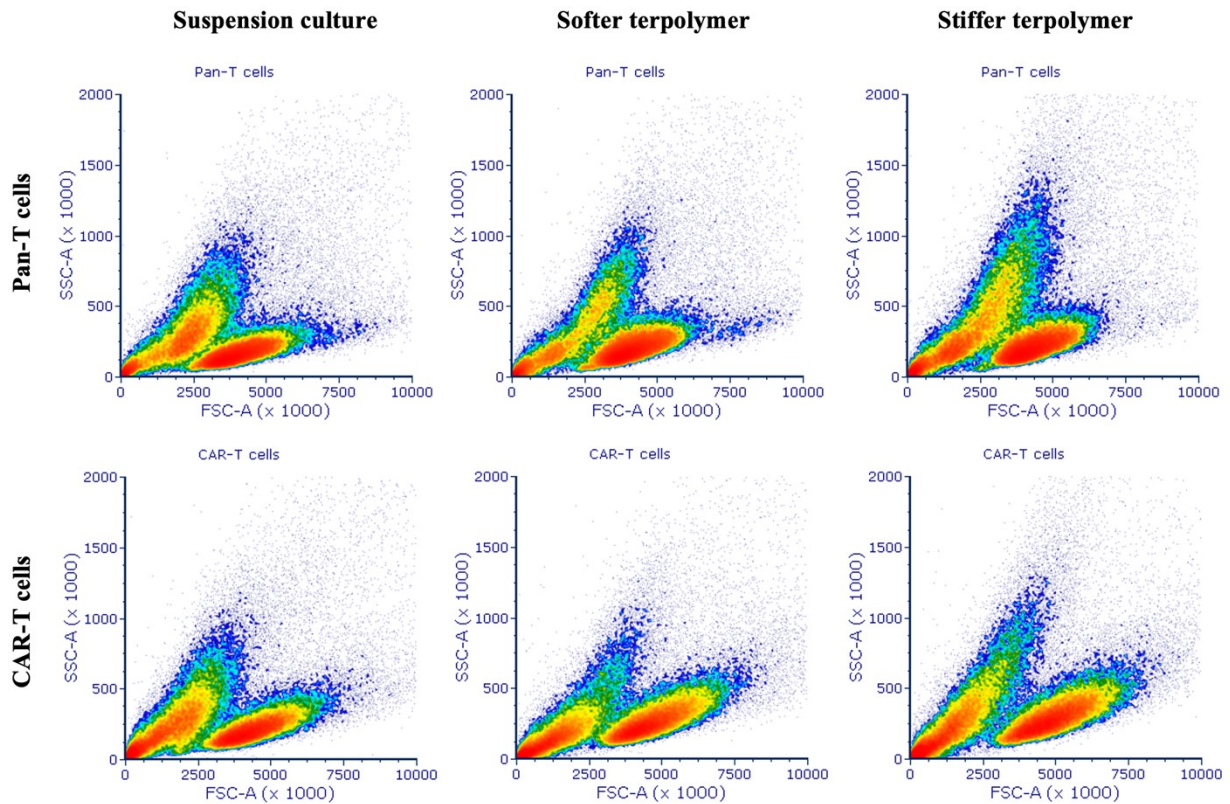

**Supplementary Figure 3:** Comparison of representative flow cytometry plots (forward vs. side scatter) of Pan-T and CAR-T cells cultured in suspension and encapsulated within the terpolymers for 5 days.
